# Supplementary material for: Immunomodulatory actions of a kynurenine-derived endogenous electrophile
Source: PubMed Central journal article supplement — Sci Adv. 2022 Jun 29;8(26):eabm9138. doi: 10.1126/sciadv.abm9138 (PMC9242454; doi:10.1126/sciadv.abm9138), 2022-06-29
Supplement: sciadv.abm9138_sm.pdf [file sciadv.abm9138_sm.pdf]

Supplementary Materials for  
**Immunomodulatory actions of a kynurenine-derived endogenous electrophile**

Mara Carreño *et al.*

Corresponding author: Dario A. Vitturi, [dav28@pitt.edu](mailto:dav28@pitt.edu)

*Sci. Adv.* **8**, eabm9138 (2022)  
DOI: 10.1126/sciadv.abm9138

**The PDF file includes:**

Figs. S1 to S6  
Tables S1 to S3

**Other Supplementary Material for this manuscript includes the following:**

Movies S1 to S10

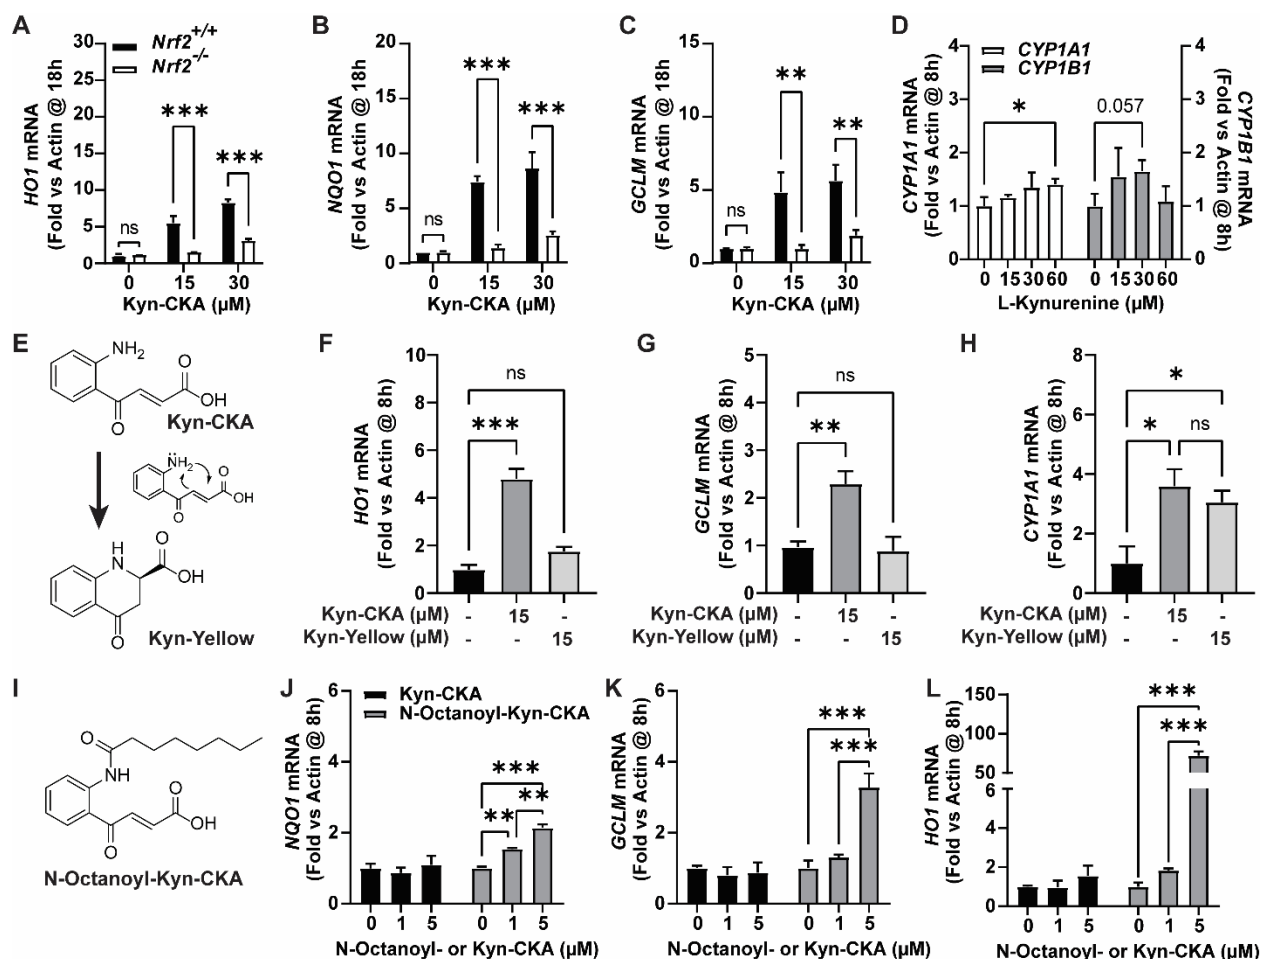

**Supplementary Fig. 1. Kyn-CKA engages Nrf2- and AhR-dependent signaling via distinct mechanisms.** (A-C) Nrf2 deficiency in mouse embryonic fibroblasts (MEF) results in significant attenuation of *HO1*, *NQO1* and *GCLM* expression following Kyn-CKA treatment (n=3). To ensure clarity, the data was normalized to 0 μM Kyn-CKA treatment within each genotype. Basal *HO1* and *NQO1* expression levels are 80-90% lower and basal *GCLM* expression is 30% lower in *Nrf2*<sup>-/-</sup> versus *Nrf2*<sup>+/+</sup> cells. (D) Activation of AhR-dependent genes by 8 h L-Kynurenine treatment in AML-12 (n=3). (E) Kyn-Yellow formation via Kyn-CKA cyclization secondary to intramolecular nucleophilic attack by the aromatic amine on the α,β-unsaturated carbonyl moiety. (F-H) Nrf2- and AhR-dependent gene expression 8 h post Kyn-CKA or Kyn-Yellow in AML-12 (n=3). (I) Cell permeable N-Octanoyl-Kyn-CKA structure. (J-L) Nrf2-dependent gene expression 8 h post Kyn-CKA or N-Octanoyl-Kyn-CKA in AML-12 (n=3). \* p < 0.05, \*\* p < 0.01, \*\*\*p < 0.0001 by two- (A-C, I-K) or one-way (D, F-H) ANOVA and Tuckey's test.

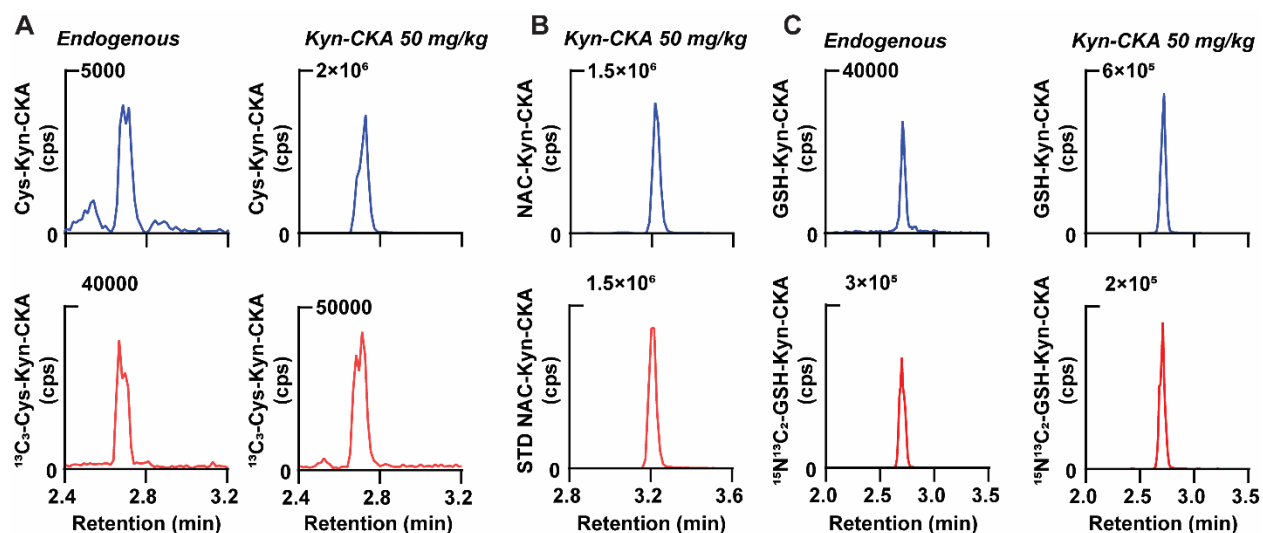

**Supplementary Fig. 2. Kyn-CKA metabolites are present *in vivo*.** (A) Representative LC-MS/MS traces showing urinary Cys-Kyn-CKA (MRM 311/120) in the absence and 8 h following intraperitoneal Kyn-CKA co-eluting with an isotopically labeled standard (MRM 314/123). (B) Representative LC-MS/MS trace of urine NAC-Kyn-CKA (MRM 353/162) 8 h post Kyn-CKA co-eluting with a synthetic standard. (C) Representative LC-MS/MS traces of hepatic GSH-Kyn-CKA adducts in the absence and presence of Kyn-CKA supplementation at 8 h. Abscissas are detector intensities expressed in counts per second (cps).

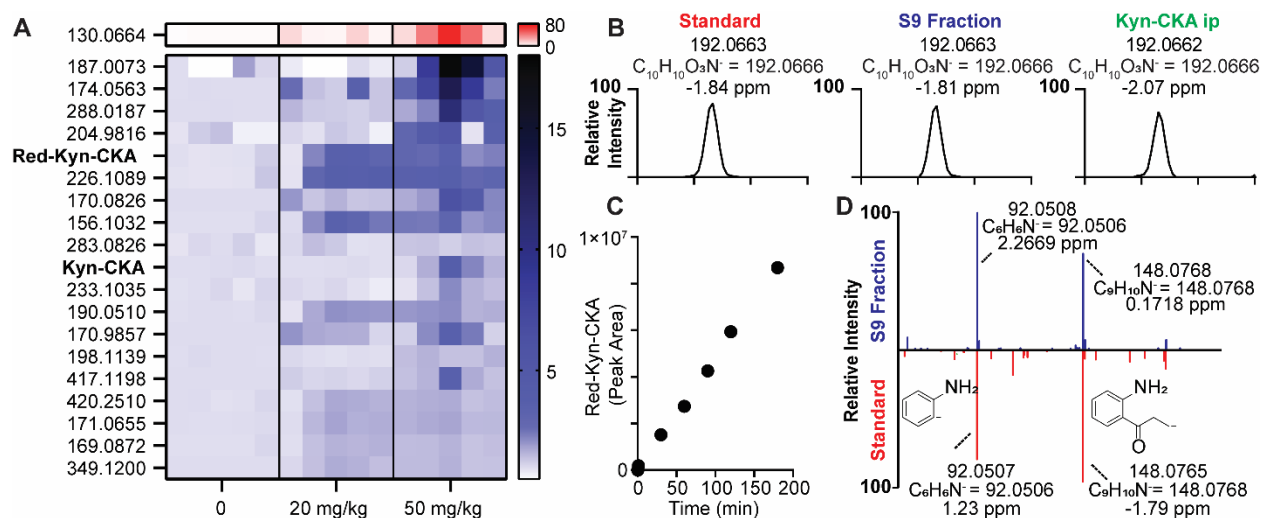

**Supplementary Fig. 3. Candidate metabolites modulated by Kyn-CKA administration.** (A)

Heatmap showing the 20 top features detected by untargeted LC-HRMS to be increased in mouse plasma following Kyn-CKA treatment using the free XCMS suite. (B) Confirmation of molecular composition (at the 2 ppm level), using high-resolution mass spectrometry, for synthetic Red-Kyn-CKA, the product of S9 fraction reduction of Kyn-CKA and Red-Kyn-CKA detected in the plasma from Kyn-CKA treated mice at 8 h. (C) Kinetic trace showing the enzymatic conversion of Kyn-CKA (200  $\mu$ M) to Red-Kyn-CKA by a rat liver S9 fraction (1 mg) in the presence of NADPH (1 mM) at 37°C, pH 7.4. (D) Structural confirmation of S9-derived products by MS<sup>2</sup> using synthetic Red-Kyn-CKA.

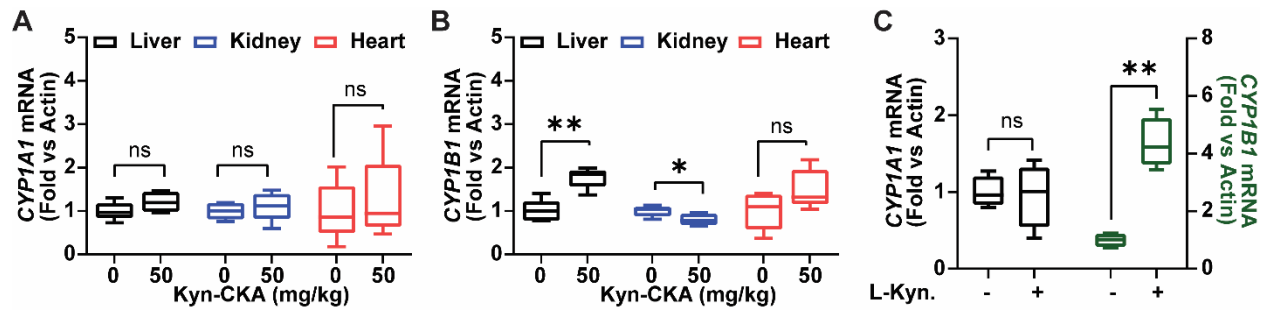

**Supplementary Fig. 4. Kyn-CKA induces AhR-dependent genes *in vivo*.** (A-B) AhR-dependent gene expression in mice 8 h post Kyn-CKA (50 mg/kg, n=5 per dose). (C) AhR-dependent gene expression in mouse liver 12 h post second L-Kyn dose (50 mg/kg ip, 2 doses, 24 h apart, n=4). \*  $p < 0.05$ , \*\*  $p < 0.01$  by t-test.

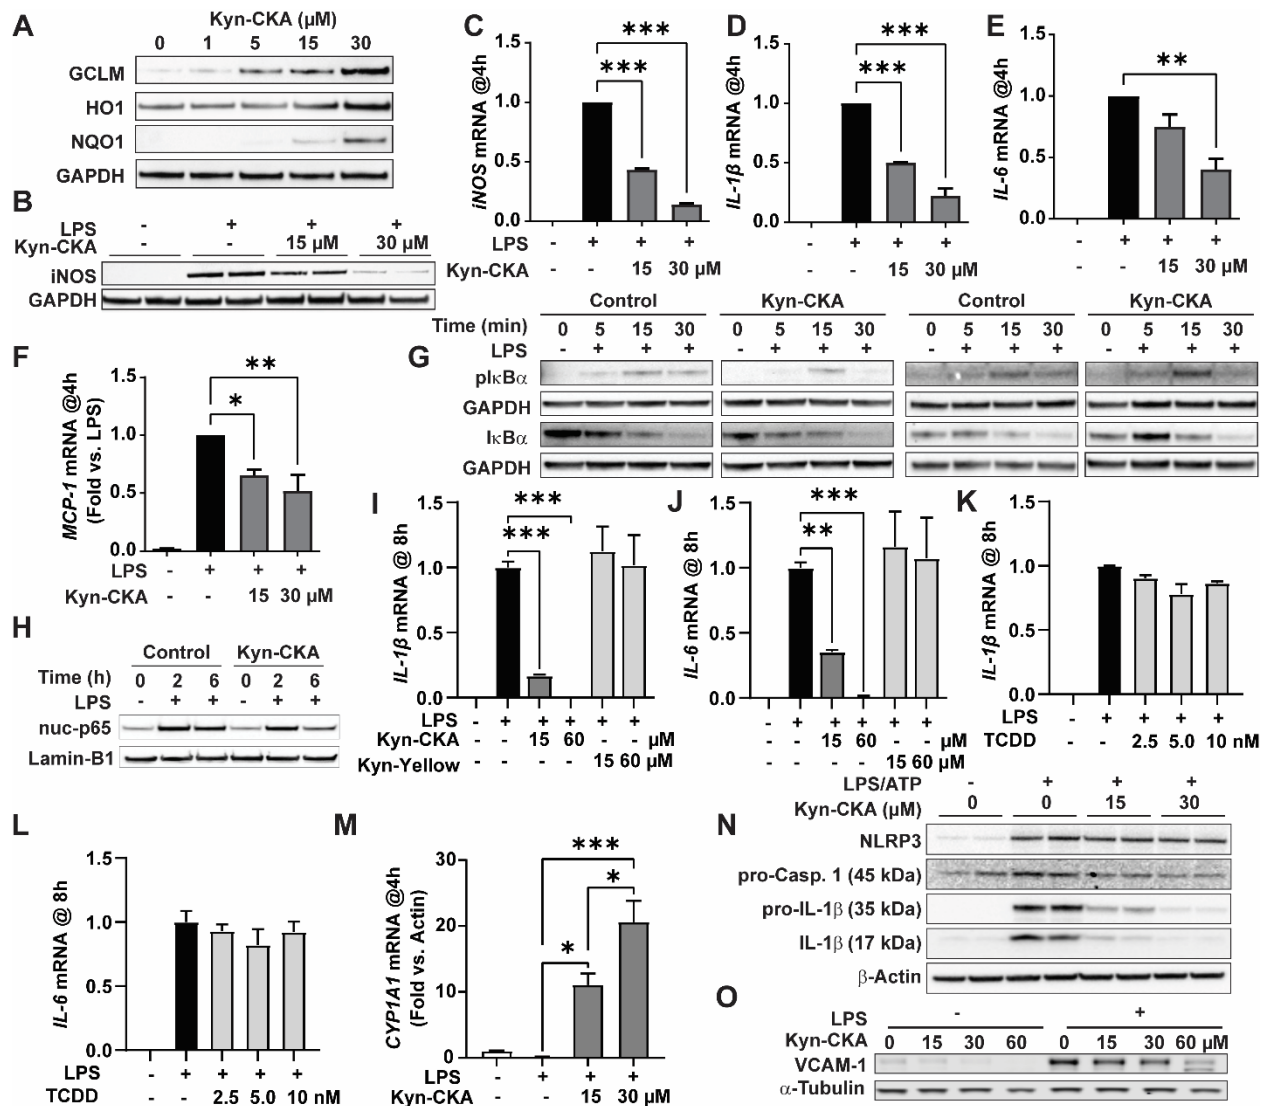

**Supplementary Fig. 5. Kyn-CKA induces Nrf2-dependent proteins and inhibits NF- $\kappa$ B and NLRP3 inflammasome engagement in macrophages** (A) Dose-dependent induction of Nrf2 target proteins by Kyn-CKA at 24 h in BMDM. (B) Kyn-CKA inhibits LPS-induced (1  $\mu$ g/mL) iNOS protein at 8 h, and (C) *iNOS* and (D-F) pro-inflammatory cytokine RNA expression at 4 h in BMDM (n=3). (G) Additional replicates for total and phospho-I $\kappa$ B $\alpha$  levels following LPS in the presence of Kyn-CKA (0 or 30  $\mu$ M) in J774a.1 cells. (H) Additional replicate for nuclear P65 in LPS-treated J774a1 versus time and Kyn-CKA (0, 30  $\mu$ M). Each lane are three combined independent wells. (I,J) Kyn-Yellow and (K,L) TCDD have no effect on LPS (1  $\mu$ g/mL) induced gene expression in J774a.1 cells (n=3). (M) Dose-dependent induction of *CYP11A1* expression in BMDM 4 h post LPS (1  $\mu$ g/mL, n=3). (N) Kyn-CKA inhibits pro-caspase-1 and pro-IL-1 $\beta$  expression, and pro-IL-1 $\beta$  processing in BMDM treated with LPS (100 ng/mL) and ATP (2 mM) for 8 h. (O) VCAM-1 expression in HPMVEC 16 h post LPS (100 ng/mL) and Kyn-CKA. \* p < 0.05, \*\* p < 0.01, \*\*\* p < 0.0001 by one-way ANOVA and Tukey's test.

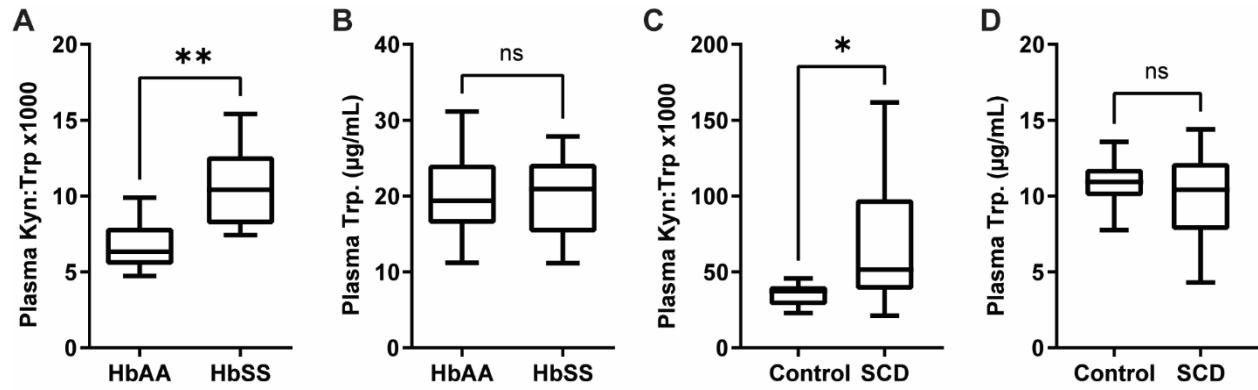

**Supplementary Fig. 6. Kynurenine synthesis is upregulated in murine and human SCD (A)** Plasma kynurenine:tryptophan ratios and (B) tryptophan levels in HbAA (n = 13) and HbSS (n = 8) Townes mice. \*\* p < 0.001 by t-test. (C) Plasma kynurenine:tryptophan ratios and (D) tryptophan levels in control (n = 12) and SCD (n = 10) human donors. \* p < 0.05 by t-test.

**Supplementary Table 1 - Antibodies:**

| <b>Antibody</b>              | <b>Catalog number</b> | <b>Company</b>     | <b>RRID</b> |
|------------------------------|-----------------------|--------------------|-------------|
| NLRP3                        | 15101                 | Cell Signaling     | AB_2722591  |
| Pro-IL-1 $\beta$             | 12242                 | Cell Signaling     | AB_2715503  |
| IL-1 $\beta$                 | 12242                 | Cell Signaling     | AB_2715503  |
| iNOS                         | 13120                 | Cell Signaling     | AB_2687529  |
| VCAM-1                       | ab134047              | Abcam              | AB_2721053  |
| HO1                          | ADI-SPA-895           | Enzo Life Sciences | AB_10618757 |
| NQO1                         | ab34173               | Abcam              | AB_2251526  |
| GCLM                         | 14241-1-AP            | Proteintech        | AB_2107832  |
| GAPDH                        | 2118                  | Cell Signaling     | AB_561053   |
| p65                          | 8242                  | Cell Signaling     | AB_10859369 |
| IKB $\alpha$                 | 4812                  | Cell Signaling     | AB_10694416 |
| Phospho-IKB $\alpha$         | 2859                  | Cell Signaling     | AB_561111   |
| Lamin-B1                     | 12586                 | Cell Signaling     | AB_2650517  |
| $\alpha$ -Rabbit (secondary) | 7074                  | Cell Signaling     | AB_2099233  |
| $\alpha$ -Mouse (secondary)  | 7076                  | Cell Signaling     | AB_330924   |

**Supplementary Table 2 - Primers used for RT-PCR:**

| <b>Primer</b>         | <b>Catalog number</b> | <b>Company</b>     |
|-----------------------|-----------------------|--------------------|
| <i>IL1B</i>           | Mm00434228            | ThermoFisher       |
| <i>IL6</i>            | Mm00446190            | ThermoFisher       |
| <i>MCPI (Ccl2)</i>    | Mm00441242            | ThermoFisher       |
| <i>HO1 (Hmox1)</i>    | Mm00516005            | ThermoFisher       |
| <i>NQO1</i>           | Mm01253561            | ThermoFisher       |
| <i>GCLM</i>           | Mm01324400            | ThermoFisher       |
| <i>iNOS (Nos2)</i>    | Mm00440502            | ThermoFisher       |
| <i>KIM-1 (Havcr1)</i> | 12001950              | BioRad             |
| <i>CYP1A1</i>         | Mm00487218            | ThermoFisher       |
| <i>CYP1B1</i>         | Mm00487229            | ThermoFisher       |
| <i>Actin</i>          | 4351315               | Applied Biosystems |

**Supplementary Table 3 - Transitions for MRM analysis:**

| <b>Metabolite</b>                                         | <b>Q1</b> | <b>Q3</b> | <b>DP</b> | <b>EP</b> | <b>CE</b> | <b>CXP</b> |
|-----------------------------------------------------------|-----------|-----------|-----------|-----------|-----------|------------|
| Kynurenine                                                | 207.1     | 190.0     | -65       | -8        | -22       | -10        |
| N-Formyl-kynurenine                                       | 235.1     | 190.0     | -65       | -8        | -22       | -10        |
| Kyn-CKA                                                   | 190.0     | 128.0     | -65       | -5        | -15       | -8         |
| Kyn-CKA                                                   | 190.0     | 144.0     | -65       | -8        | -22       | -12        |
| Kyn-CKA                                                   | 190.0     | 146.0     | -65       | -8        | -15       | -10        |
| GSH-Kyn-CKA                                               | 497.0     | 306.0     | -55       | -10       | -20       | -8         |
| Red-Kyn-CKA                                               | 192.1     | 148.1     | -55       | -7        | -15       | -6         |
| Red-Kyn-CKA                                               | 192.1     | 92.0      | -55       | -3        | -27       | -12        |
| Cys-Kyn-CKA                                               | 311.1     | 120.0     | -70       | -5        | -30       | -10        |
| Cys-Kyn-CKA                                               | 311.1     | 190.0     | -70       | -5        | -25       | -10        |
| NAC-Kyn-CKA                                               | 369.0     | 162.0     | -70       | -8        | -20       | -7         |
| <sup>15</sup> N <sup>13</sup> C <sub>2</sub> -GSH-Kyn-CKA | 500.1     | 309.1     | -70       | -5        | -20       | -10        |
| <sup>13</sup> C <sub>3</sub> -Cys-Kyn-CKA                 | 314.1     | 123.0     | -70       | -5        | -30       | -10        |
| <sup>13</sup> C <sub>3</sub> -Cys-Kyn-CKA                 | 314.1     | 190.0     | -70       | -5        | -25       | -10        |
| Trp-d <sub>3</sub>                                        | 206.1     | 116.0     | -60       | -8        | -22       | -8         |

DP: declustering potential, EP: entrance potential, CE: collision energy, CXP: collision cell exit potential
